# Supplementary material for: Is upper limb virtual reality training more intensive than conventional training for patients in the subacute phase after stroke? An analysis of treatment intensity and content
Source: PubMed Central journal article supplement (PMC5106796; doi:10.1186/s12883-016-0740-y), 2016-11-11
Supplement: 12883_2016_740_MOESM1_ESM.pdf [file 12883_2016_740_MOESM1_ESM.pdf]

# Appendix 1. Scoring form

Patient-ID:..... Total time:..... Effective time total:..... Total tasks:.....

| Task/game number                                                                                                                         |                                                                                       | 1 | 2 | 3 | 4 | 5 | 6 | 7 | 8 | 9 | 10 |
|------------------------------------------------------------------------------------------------------------------------------------------|---------------------------------------------------------------------------------------|---|---|---|---|---|---|---|---|---|----|
| Task description                                                                                                                         |                                                                                       |   |   |   |   |   |   |   |   |   |    |
| Time                                                                                                                                     |                                                                                       |   |   |   |   |   |   |   |   |   |    |
| Number of reps                                                                                                                           |                                                                                       |   |   |   |   |   |   |   |   |   |    |
| Functional tasks (register time used) (Choose either functional tasks, single plane movement/single joint movement of strength-exercise) | Reach within one armlength in combination with fine motor skills (grasp, pincergrasp) |   |   |   |   |   |   |   |   |   |    |
|                                                                                                                                          | Reach more than one armlength away in combination with fine motor skills.             |   |   |   |   |   |   |   |   |   |    |
| Mobilization/warm up/single joint movement (register time used) (repetitive movements without a goal)                                    | Transversal                                                                           |   |   |   |   |   |   |   |   |   |    |
|                                                                                                                                          | Frontal                                                                               |   |   |   |   |   |   |   |   |   |    |
|                                                                                                                                          | Sagittal                                                                              |   |   |   |   |   |   |   |   |   |    |
| Strength-exercise (register time used)                                                                                                   |                                                                                       |   |   |   |   |   |   |   |   |   |    |
| Exercise progression                                                                                                                     | Yes                                                                                   |   |   |   |   |   |   |   |   |   |    |
|                                                                                                                                          | No                                                                                    |   |   |   |   |   |   |   |   |   |    |

|                                                                                                                                                    |                                |   |   |   |   |   |   |   |   |   |    |
|----------------------------------------------------------------------------------------------------------------------------------------------------|--------------------------------|---|---|---|---|---|---|---|---|---|----|
| Unimanual (Is mainly the affected arm / hand used to perform the task?)<br>Bimanual (Are both hands used, either simultaneously or alternatingly?) | Unimanual                      |   |   |   |   |   |   |   |   |   |    |
|                                                                                                                                                    | Bimanual                       |   |   |   |   |   |   |   |   |   |    |
| Real-life object manipulation                                                                                                                      | Yes                            |   |   |   |   |   |   |   |   |   |    |
|                                                                                                                                                    | No                             |   |   |   |   |   |   |   |   |   |    |
| Which body parts are moved? (predominantly) (max 3 each side)                                                                                      | Arm affected                   |   |   |   |   |   |   |   |   |   |    |
|                                                                                                                                                    | Lower arm affected (sup./pron) |   |   |   |   |   |   |   |   |   |    |
|                                                                                                                                                    | Hand affected                  |   |   |   |   |   |   |   |   |   |    |
|                                                                                                                                                    | Single fingers aff.            |   |   |   |   |   |   |   |   |   |    |
|                                                                                                                                                    | Arm unaffected                 |   |   |   |   |   |   |   |   |   |    |
|                                                                                                                                                    | Lower arm unaff. (sup./pron)   |   |   |   |   |   |   |   |   |   |    |
|                                                                                                                                                    | Hand unaff.                    |   |   |   |   |   |   |   |   |   |    |
| Single fingers unaff                                                                                                                               |                                |   |   |   |   |   |   |   |   |   |    |
| Feedback                                                                                                                                           | Verbal                         |   |   |   |   |   |   |   |   |   |    |
|                                                                                                                                                    | Visual                         |   |   |   |   |   |   |   |   |   |    |
|                                                                                                                                                    | Auditiv                        |   |   |   |   |   |   |   |   |   |    |
|                                                                                                                                                    | Tactile                        |   |   |   |   |   |   |   |   |   |    |
| Task/game number                                                                                                                                   |                                | 1 | 2 | 3 | 4 | 5 | 6 | 7 | 8 | 9 | 10 |
